# Supplementary material for: Bamboo Shoot and Artemisia capillaris Extract Mixture Ameliorates Dextran Sodium Sulfate-Induced Colitis
Source: MDPI journal article supplement (doi:10.3390/cimb44100345), 2022-10-20
Supplement: s1 [file s1]

**Supplementary Figure S1.** Effects of the ratio of BA extract mixtures on body weight loss, stool constancy, bloody stool, and DAI score

| DAY                   | 2 day       |                   |              |          | 3 day       |                   |              |              |
|-----------------------|-------------|-------------------|--------------|----------|-------------|-------------------|--------------|--------------|
| Group                 | (%)         | score             |              |          | (%)         | score             |              |              |
|                       | Weight      | stool consistency | bloody stool | DAI      | Weight(%)   | stool consistency | bloody stool | DAI          |
| CON                   | 100.67±0.58 | 0±0               | 0±0          | 0±0      | 102.77±2.58 | 0±0               | 0±0          | 0.2±0.44     |
| 2.5% DSS              | 98.87±2.02  | 0±0               | 0.8±1.09     | 1.6±1.34 | 99.51±2.79  | 1.0±0, *          | 1.6±0.89, *  | 3.0±1.0, **  |
| DSS+BA (BS:AC,100:0)  | 100.34±0.82 | 0.2±0.44          | 0±0          | 0.25±0.5 | 100.95±1.74 | 0.2±0.44          | 0.8±1.09     | 1.75±1.25    |
| DSS+BA (BS:AC, 70:30) | 100.16±0.55 | 0±0               | 0±0          | 0.4±0.54 | 99.59±1.26  | 0.8±0.44          | 0.4±0.89     | 1.8±1.09     |
| DSS+BA (BS:AC, 50:50) | 100.26±1.59 | 0±0               | 0±0          | 0.6±0.54 | 100.09±0.54 | 0.2±0.44          | 0.4±0.89     | 0.6±0.89, ## |
| DSS+BA (BS:AC, 30:70) | 100.01±2.29 | 0.2±0.44          | 0.4±0.89     | 1.2±1.30 | 100.60±2.39 | 0.6±0.54          | 0.8±1.09     | 1.8±2.04     |
| DSS+BA (BS:AC, 0:100) | 101.75±4.18 | 0.6±0.54          | 0.8±1.09     | 1.8±1.09 | 102.42±3.68 | 0.4±0.54          | 1.2±1.09     | 1.8±1.30     |

| DAY                   | 4 day       |                   |                 |                   | 5 day           |                     |               |                   |
|-----------------------|-------------|-------------------|-----------------|-------------------|-----------------|---------------------|---------------|-------------------|
| Group                 | (%)         | score             |                 |                   | (%)             | score               |               |                   |
|                       | Weight      | stool consistency | bloody stool    | DAI               | Weight(%)       | stool consistency   | bloody stool  | DAI               |
| CON                   | 99.98±2.74  | 0±0               | 0±0             | 0.2±0.44          | 103.14±2.97     | 0±0                 | 0±0           | 0±0               |
| 2.5% DSS              | 99.66±3.58  | 1.0±0.7, *        | 3.6±0.89, ***   | 5.0±1.41, ***     | 96.72±4.66, *** | 2.8±1.09, ***       | 4.0±0, ***    | 7.6±1.14, ***     |
| DSS+BA (BS:AC,100:0)  | 99.93±0.98  | 0.8±0.44          | 2.0±2.0, **, #  | 3.75±1.5, ***     | 97.29±2.37, **  | 2.0±0, ***          | 3.6±0.89, *** | 6.4±1.34, ***     |
| DSS+BA (BS:AC, 70:30) | 98.76±1.83  | 1.4±1.51, **, &&  | 2.0±1.41, **, # | 4.0±2.12, ***, &  | 96.95±2.78, *** | 1.4±0.89, **, ##    | 4.0±0, ***    | 6.2±1.09, ***     |
| DSS+BA (BS:AC, 50:50) | 101.21±1.93 | 0.2±0.44          | 1.2±1.09, ###   | 2.0±0.70, ###     | 99.91±2.32      | 1.8±1.30, ***, #    | 4.0±0, ***    | 5.4±0.89, ***, #  |
| DSS+BA (BS:AC, 30:70) | 99.67±2.24  | 1.4±0.54, **, &&  | 2.4±1.67, ***   | 4.6±2.07, ***, && | 98.09±4.12, *   | 1.8±1.30, , ***, #  | 3.2±1.09, *** | 5.8±2.38, ***     |
| DSS+BA (BS:AC, 0:100) | 100.75±6.00 | 1.2±0.83, **, &   | 2.0±2.0, **, #  | 3.4±2.07, ***     | 100.32±5.35     | 1.4±0.54, , ***, ## | 3.2±1.09, *** | 5.2.±1.78, ***, # |

Data are mean ± SD (n = 5 per group)  
\*  $p < 0.05$ ; \*\*  $p < 0.01$ ; \*\*\*  $p < 0.001$  compared to control group  
#  $p < 0.05$ ; ##  $p < 0.01$ ; ###  $p < 0.001$  compared to 2.5% DSS group  
&  $p < 0.05$ ; &&  $p < 0.01$  compared to DSS+BA (BS:AC, 50:50) group
